# Supplementary material
Source: Springer Nature journal article supplement (https://www.springermedizin.de/resource/supplementary/12967_2008_273_MOESM5_ESM.pdf/9576080)

# Observation times

**0      48      72      96      120**

**hr**

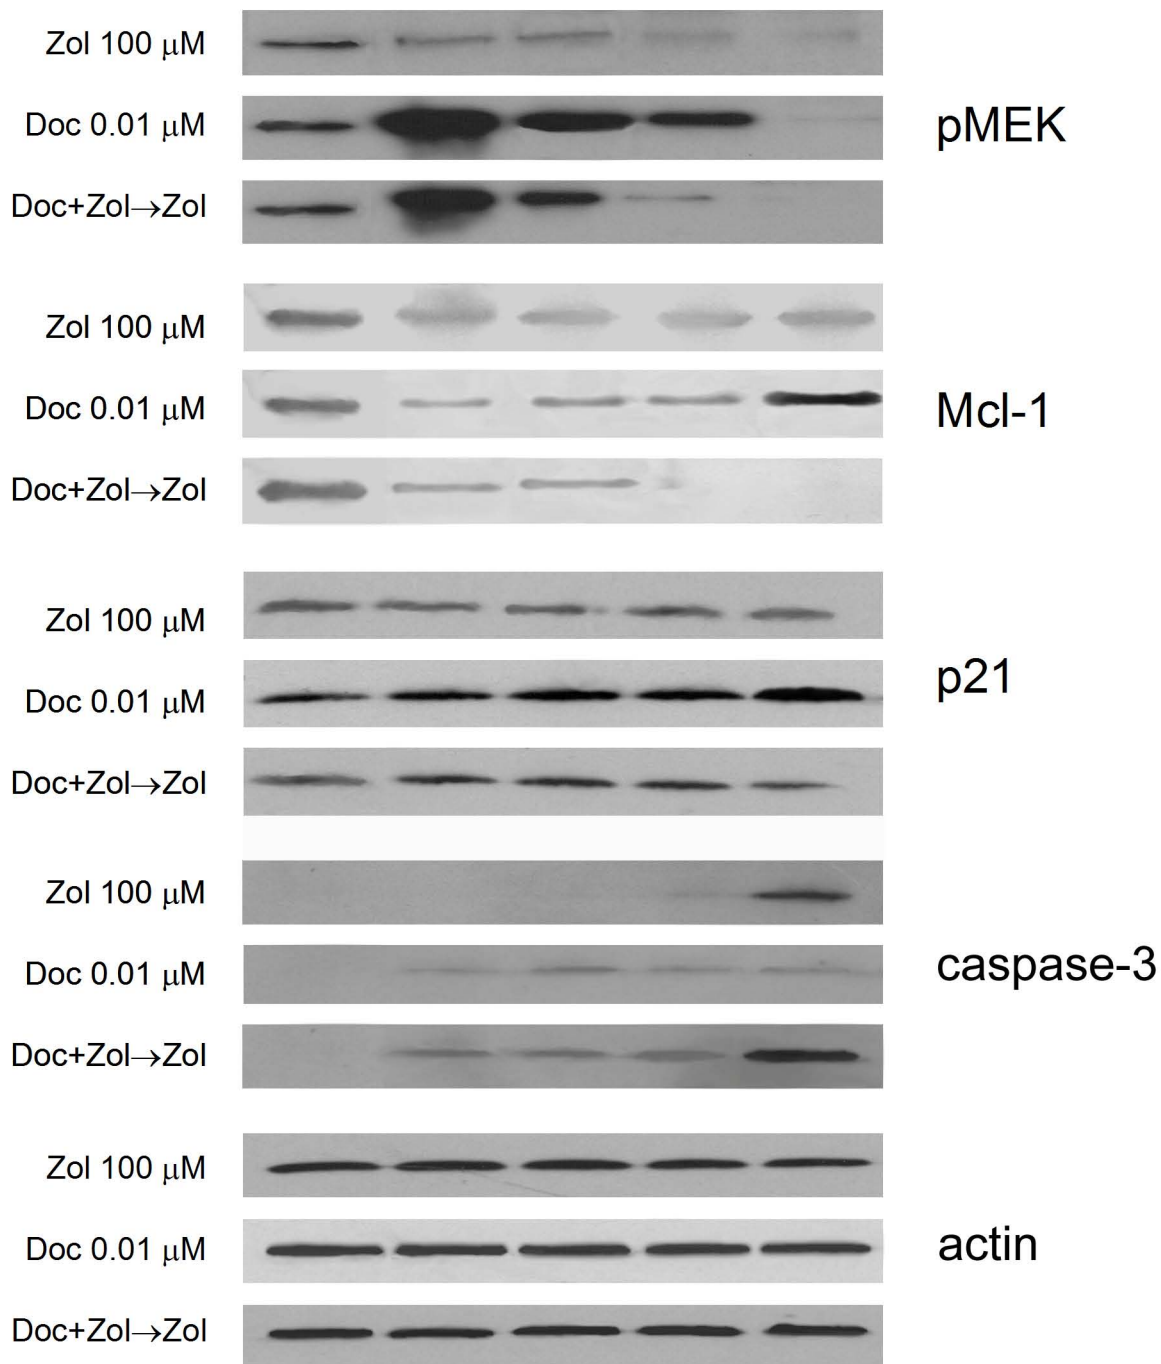

Supplement: MOESM5 [file 9576080]
